# Supplementary material for: Carbon–arsine and carbon–antimony bonds activation of AsPh3 and SbPh3 at dimanganese and dirhenium centers in bimetallic clusters
Source: Research Square preprint supplement (doi:10.21203/rs.3.rs-7815224/v1), 2025-11-04
Supplement: Supplementary file 1 [file 0268e7db954ba1372773fd53.docx]

**Highlights for review**

- Reactions of EPh3 (E = As, Sb) with labile bisacetonitrile derivatives of Mn- and Re-carbonyl, [M2(CO)8(NCMe)2] (Mn, Re) are described.
- Potentially important comparison between reaction products from two semimetals AsPh3 and SnPh3.
- All complexes resulted from oxidative-addition of triphenyl arsine/stibine to the rhenium/manganese centre, with one example of capturing CO2, and C–As and C-Sb bond activations.
- Crystal structures for all new Mn-As/Sb complexes and Re-As bimetallic complexes,
