# Supplementary material for: Carbon–arsine and carbon–antimony bonds activation of AsPh3 and SbPh3 at dimanganese and dirhenium centers in bimetallic clusters
Source: Research Square preprint supplement (doi:10.21203/rs.3.rs-7815224/v1), 2025-11-04
Supplement: Supplementary file 2 [file 48dbb788df3120ad306c0b92.docx]

**Graphical abstract**

Carbon–arsine and carbon–antimony bonds activation of AsPh3 at dimanganese and dirhenium centers in bimetallic clusters
